# Supplementary material for: The Adaptive Significance of Natural Genetic Variation in the DNA Damage Response of Drosophila melanogaster
Source: PubMed Central journal article supplement (PMC4780809; doi:10.1371/journal.pgen.1005869), 2016-03-07

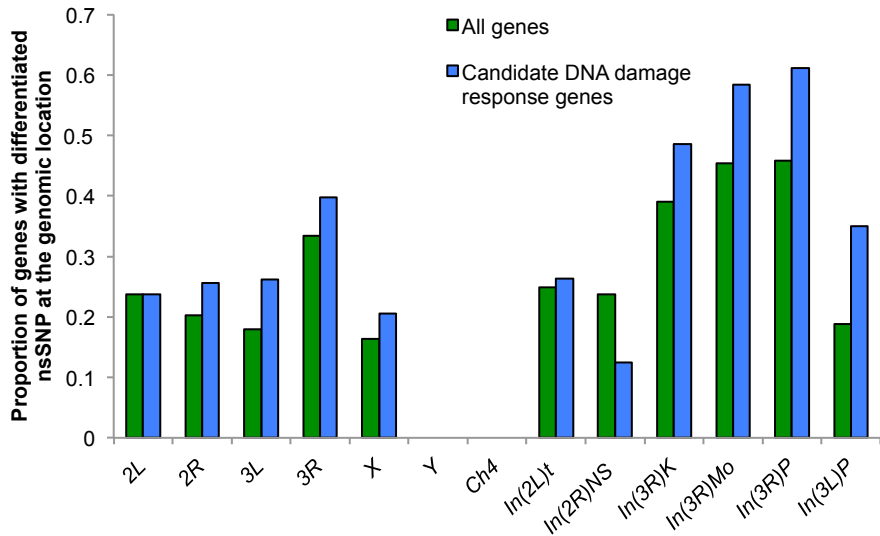

Supplement: pgen.1005869.s005.pdf [file pgen.1005869.s005.pdf]
