# Supplementary material for: The Adaptive Significance of Natural Genetic Variation in the DNA Damage Response of Drosophila melanogaster
Source: PubMed Central journal article supplement (PMC4780809; doi:10.1371/journal.pgen.1005869), 2016-03-07
Supplement: pgen.1005869.s010.pdf [file pgen.1005869.s010.pdf]

| Category                                   | Central tendency | Panama (FPKM <sup>1</sup> ) | Rhode island (FPKM <sup>1</sup> ) |
|--------------------------------------------|------------------|-----------------------------|-----------------------------------|
| All expressed gene (FPKM <sup>1</sup> >1)  | Median           | 29.54                       | 28.73                             |
|                                            | Mean             | 84.93                       | 84.21                             |
| UV response genes                          | Median           | 45.12                       | 41.57                             |
|                                            | Mean             | 117.33                      | 117.38                            |
| Differentially expressed UV response genes | Median           | 32.15                       | 26.32                             |
|                                            | Mean             | 82.94                       | 82.69                             |

<sup>1</sup>Fragments Per Kilobase of transcript per Million mapped reads
