# Supplementary material for: The Adaptive Significance of Natural Genetic Variation in the DNA Damage Response of Drosophila melanogaster
Source: PLoS Genet. 2016 Mar 7;12(3):e1005869. doi: 10.1371/journal.pgen.1005869 (PMC4780809; doi:10.1371/journal.pgen.1005869)
Supplement: S1 Table — (XLSX) [file pgen.1005869.s007.xlsx]

## Sheet: Sheet1
S2_Table: List of the 211 DNA damage response candidate genes
FlyBase ID	Symbol	Human Orthologs
FBgn0020238	14-3-3epsilon	YWHAH ; YWHAB ; SFN ; YWHAZ ; YWHAG ; YWHAQ ; ENSG00000108953
FBgn0024912	agt	-
FBgn0013746	alien	-
FBgn0038576	Arp5	ACTR5
FBgn0025716	Bap55	ACTL6B ; ACTL6A
FBgn0002906	Blm	BLM
FBgn0050169	Brca2	-
FBgn0011785	BRWD3	BRWD1 ; BRWD3 ; PHIP
FBgn0263979	Caf1-55	ENSG00000162521
FBgn0030054	Caf1-180	CHAF1A
FBgn0026143	CDC45L	CDC45
FBgn0004106	Cdk1	CDK2 ; CDK3 ; CDK16 ; CDK5 ; CDK17 ; CDK14 ; CDK1 ; ENSG00000117266
FBgn0015618	Cdk8	CDK19
FBgn0030657	cerv	-
FBgn0032698	CG10336	TIPIN
FBgn0039147	CG10694	RAD23B ; RAD23A
FBgn0037911	CG10898	NUDT18
FBgn0026876	CG11403	ENSG00000013573
FBgn0029825	CG12728	-
FBgn0035162	CG13900	SF3B3
FBgn0033566	CG18004	-
FBgn0042173	CG18853	-
FBgn0031540	CG3238	PIF1
FBgn0052756	CG32756	-
FBgn0035996	CG3448	-
FBgn0034976	CG4049	ATRX ; RAD54L2
FBgn0029798	CG4078	RTEL1 ; RTEL1
FBgn0259195	CG42299	NSMCE2
FBgn0259196	CG42300	NSMCE2
FBgn0259728	CG42382	-
FBgn0038704	CG5316	APTX
FBgn0026737	CG6171	APLF
FBgn0036843	CG6812	SFXN2 ; ENSG00000107819 ; SFXN1
FBgn0032907	CG9272	NTHL1
FBgn0029504	CHES-1-like	FOXN2
FBgn0044324	Chro	-
FBgn0015024	CkIalpha	CSNK1A1L ; CSNK1A1 ; CSNK1E
FBgn0052251	Claspin	-
FBgn0267967	corolla	-
FBgn0030028	Corp	-
FBgn0027057	CSN1b	GPS1
FBgn0027055	CSN3	COPS3
FBgn0027054	CSN4	COPS4
FBgn0027053	CSN5	COPS5
FBgn0028837	CSN6	ENSG00000168090
FBgn0028836	CSN7	COPS7B ; COPS7A
FBgn0261437	CSN8	COP9
FBgn0015509	Cul1	CUL2 ; CUL1
FBgn0033260	Cul4	ENSG00000139842 ; ENSG00000158290
FBgn0000405	CycB	CCNB1 ; CCNB2
FBgn0004597	CycC	CCNC
FBgn0010382	CycE	CCNE2 ; CCNE1
FBgn0039858	CycG	-
FBgn0015075	Ddx1	DDX1
FBgn0029131	Debcl	-
FBgn0039710	dgt1	KANSL2
FBgn0034537	DMAP1	DMAP1
FBgn0262619	DNA-ligI	LIG1
FBgn0263600	DNApol-delta	ENSG00000062822
FBgn0264326	DNApol-epsilon255	POLE
FBgn0035644	DNApol-epsilon58	ENSG00000100479
FBgn0037141	DNApol-eta	POLH
FBgn0037554	DNApol-iota	POLI
FBgn0011763	Dp	TFDP3 ; TFDP2 ; TFDP1
FBgn0015664	Dref	-
FBgn0000996	dup	CDT1
FBgn0000541	E(bx)	ENSG00000257887 ; ENSG00000257278 ; ENSG00000171634
FBgn0011766	E2f1	-
FBgn0024371	E2f2	-
FBgn0023213	eIF4G	EIF4G1 ; EIF4G3
FBgn0028515	EndoGI	XRCC5
FBgn0028434	Ercc1	ERCC1
FBgn0038827	Fancd2	FANCD2
FBgn0033354	FANCI	ENSG00000140525
FBgn0037781	Fancl	FANCL
FBgn0038889	Fancm	FANCM
FBgn0025832	Fen1	FEN1
FBgn0024555	flfl	ENSG00000138041 ; ENSG00000100796
FBgn0033273	Gasz	-
FBgn0263831	Gen	GEN1
FBgn0250732	gfzf	-
FBgn0260817	gkt	TDP1
FBgn0004913	Gnf1	RFC1
FBgn0261278	grp	CHEK1
FBgn0001179	hay	ERCC3
FBgn0003997	hid	-
FBgn0036815	HipHop	-
FBgn0001197	His2Av	HIST3H2A ; HIST1H2AD ; ENSG00000203812 ; HIST1H2AK ; HIST1H2AB ; H2AFV ; HIST1H2AC ; HIST1H2AK ; HIST1H2AH ; HIST1H2AK ; ENSG00000183558 ; H2AFJ ; H2AFZ ; HIST1H2AJ ; HIST1H2AK ; HIST1H2AA ; HIST2H2AC ; HIST2H2AB ; HIST1H2AB ; H2AFX ; HIST1H2AK
FBgn0261456	hpo	STK3 ; STK4
FBgn0026417	Hus1-like	HUS1 ; HUS1B
FBgn0011774	Irbp	XRCC6
FBgn0266282	jnj	SMC6
FBgn0027338	Kap-alpha3	KPNA2 ; KPNA1 ; KPNA7 ; KPNA6 ; KPNA4 ; KPNA3
FBgn0041627	Ku80	XRCC5
FBgn0038035	lig3	LIG4 ; LIG3
FBgn0030506	Lig4	LIG4 ; LIG3
FBgn0019686	lok	CHEK2
FBgn0010602	lwr	UBE2I
FBgn0037621	M1BP	-
FBgn0037481	MAGE	MAGEA11 ; MAGEA3 ; NDN ; ENSG00000154545 ; MAGEB2 ; ENSG00000254585 ; MAGED1 ; MAGEB16 ; MAGEB3 ; ENSG00000184750 ; MAGEA6 ; MAGEA10 ; MAGED2 ; MAGEE2 ; MAGEC1 ; MAGEA9 ; ENSG00000187243 ; MAGEB4 ; MAGEA8 ; ENSG00000123584 ; MAGEA1 ; MAGEB10 ; MAGEF1 ; NDNL2 ; ENSG00000183305 ; MAGEC2 ; MAGEA12 ; MAGEB18 ; MAGEB5 ; MAGEB6 ; MAGEB17 ; TRO ; MAGEB1 ; MAGEH1 ; MAGEC3
FBgn0038016	MBD-R2	-
FBgn0024332	Mcm3	MCM3
FBgn0020633	Mcm7	MCM7
FBgn0004419	me31B	DDX6
FBgn0038578	MED17	MED17
FBgn0035754	MED4	MED4
FBgn0004367	mei-41	ATR
FBgn0002707	mei-9	ERCC4
FBgn0002716	mei-W68	ENSG00000054796
FBgn0034726	Mes4	POLE4 ; NFYC
FBgn0267977	mh	ENSG00000010072
FBgn0031399	mio	MIOS
FBgn0011659	Mlh1	MLH1
FBgn0037301	Mms19	MMS19
FBgn0031885	Mnn1	MEN1
FBgn0014340	mof	KAT6A ; KAT7 ; ENSG00000156650
FBgn0261019	moi	-
FBgn0020270	mre11	MRE11A
FBgn0261109	mrn	TFIIH
FBgn0036486	Msh6	MSH6
FBgn0002872	mu2	-
FBgn0002878	mus101	TOPBP1
FBgn0002887	mus201	ERCC5 ; ENSG00000270181
FBgn0002891	mus205	REV3L
FBgn0002901	mus304	-
FBgn0002905	mus308	POLQ
FBgn0002909	mus312	-
FBgn0040347	mus81	MUS81
FBgn0040298	Myt1	PKMYT1
FBgn0261530	nbs	NBN
FBgn0261617	nej	CREBBP ; EP300
FBgn0085436	Not1	CNOT1
FBgn0031848	Nse1	NSMCE1
FBgn0032251	Nse4	NSMCE4A ; EID3
FBgn0262527	nsl1	C2orf67 ; KIAA1267
FBgn0027864	Ogg1	OGG1
FBgn0002989	okr	RAD54B ; RAD54L
FBgn0039044	p53	TP63 ; TP73 ; TP53
FBgn0005655	PCNA	PCNA
FBgn0003082	phr	-
FBgn0016054	phr6-4	ENSG00000121671 ; CRY1
FBgn0260962	pic	DDB1
FBgn0011660	Pms2	PMS2
FBgn0283467	Pol32
FBgn0040078	pont	ENSG00000175792
FBgn0036239	Pop2	CNOT7 ; CNOT8
FBgn0011474	Set8	ENSG00000183955
FBgn0026778	Rad1	RAD1
FBgn0025808	Rad17	ENSG00000152942
FBgn0026777	Rad23	RAD23B ; RAD23A
FBgn0034728	rad50	RAD50
FBgn0033389	Rad51C	-
FBgn0030931	Rad51D	-
FBgn0025807	Rad9	RAD9A ; ENSG00000151164
FBgn0015799	Rbf	RB1 ; RBL2 ; RBL1
FBgn0038390	Rbf2	RB1 ; RBL2 ; RBL1
FBgn0033897	Rcd1	ENSG00000114982
FBgn0263832	Rcd5	ENSG00000187778
FBgn0040290	RecQ4	-
FBgn0027375	RecQ5	RECQL5
FBgn0040075	rept	RUVBL2
FBgn0035150	Rev1	ENSG00000135945
FBgn0260985	RfC4	RFC2 ; RFC4 ; RFC5
FBgn0017550	Rga	CNOT2
FBgn0010173	RpA-70	RPA1
FBgn0032906	RPA2	RPA4 ; RPA2
FBgn0266421	RPA3	-
FBgn0263757	Rpb4	POLR2D ; TADA2A
FBgn0033571	Rpb5	POLR2E
FBgn0037121	Rpb8	POLR2H
FBgn0004855	RpII15	POLR2I
FBgn0003275	RpII18	POLR2F
FBgn0003277	RpII215	ENSG00000181222
FBgn0000100	RpLP0	RPLP0
FBgn0011706	rpr	-
FBgn0002622	RpS3	RPS3
FBgn0004584	Rrp1	APEX1
FBgn0025637	SkpA	SKP1
FBgn0037263	slx1	ENSG00000181625
FBgn0015615	SMC3	SMC3
FBgn0052438	SMC5	SMC5
FBgn0037338	Snm1	DCLRE1A ; DCLRE1B
FBgn0015546	spel1	MSH2
FBgn0086683	Spf45	RBM17
FBgn0003479	spn-A	RAD51 ; DMC1
FBgn0003480	spn-B	XRCC3
FBgn0003482	spn-D	RAD51C
FBgn0040273	Spt5	SUPT5H
FBgn0037202	Ssl1	GTF2H2 ; GTF2H2C ; GTF2H2C
FBgn0003612	Su(var)2-10	PIAS1 ; PIAS4 ; PIAS3 ; PIAS2
FBgn0037874	Tctp	TPT1
FBgn0045035	tefu	ATM
FBgn0033929	Tfb1	GTF2H1
FBgn0031309	Tfb4	GTF2H3
FBgn0265968	Tfb5	GTF2H5
FBgn0026869	Thd1	TDG
FBgn0038118	timeout	TIMELESS
FBgn0003732	Top2	ENSG00000077097 ; TOP2A
FBgn0040268	Top3alpha	TOP3A
FBgn0267351	Topors	TOPORS
FBgn0015553	tos	EXO1
FBgn0004436	Ubc6	UBE2A ; UBE2C ; UBE2B
FBgn0260749	Utx	KDM6A ; ENSG00000132510 ; UTY
FBgn0260987	vtd	RAD21 ; RAD21L1
FBgn0040066	wds	WDR5B ; WDR5
FBgn0011737	Wee1	WEE1 ; WEE2
FBgn0011739	wts	STK38 ; ENSG00000131023 ; LATS2
FBgn0004832	Xpac	XPA
FBgn0004698	Xpc	XPC
FBgn0261850	Xpd	ERCC2
FBgn0026751	XRCC1	ENSG00000073050 ; ENSG00000254469
